# Supplementary material for: Hierarchically porous activated carbons prepared via a dissipative process: a high-capacity cathode for Li-ion capacitors
Source: Royal Society of Chemistry journal article supplement (doi:10.1039/d1nr05506b), 2021-12-20
Supplement: d1nr05506b1.pdf [file d1nr05506b1.pdf]

## Supplementary Information

### Hierarchically porous activated carbons prepared via a dissipative process: high-capacity cathode for Li ion capacitors

*Qi Cao, Guoqing Ning\*, Fan Yang, Ye Wang, Bofeng Li, Xinlong Ma*

State Key Laboratory of Heavy Oil Processing, China University of Petroleum, Beijing, 102249, China.

\*Corresponding author E-mail: ninggq@qq.com

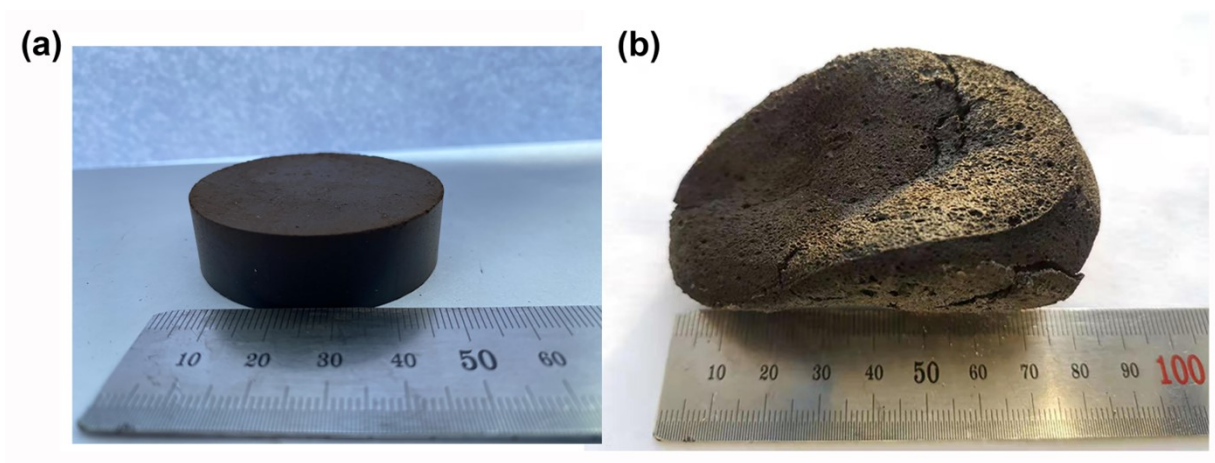

**Fig. S1** The digital images of the asphalt-KOH tablet (a) before and (b) after the 800 °C calcination.

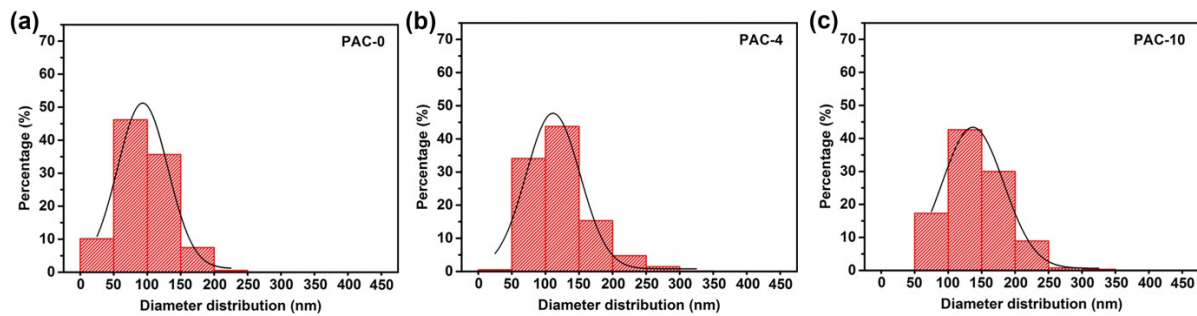

**Fig. S2** Pore diameter distribution statistics (based on SEM images) of PACs prepared at the tableting pressure of 0 (a), 4 (b) and 10 MPa (c).

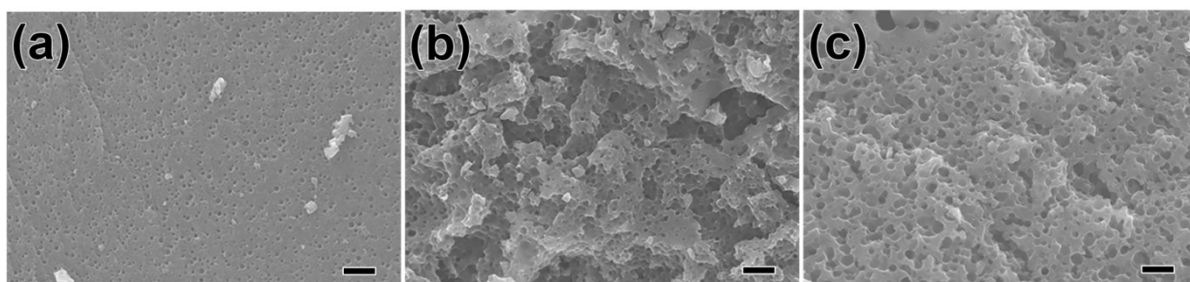

**Fig. S3** SEM images of PACs prepared at the tableting pressure of 0 (a), 4 (b) and 10 MPa (c) with a KOH to asphalt ratio of 1. Scale bars, 500 nm.

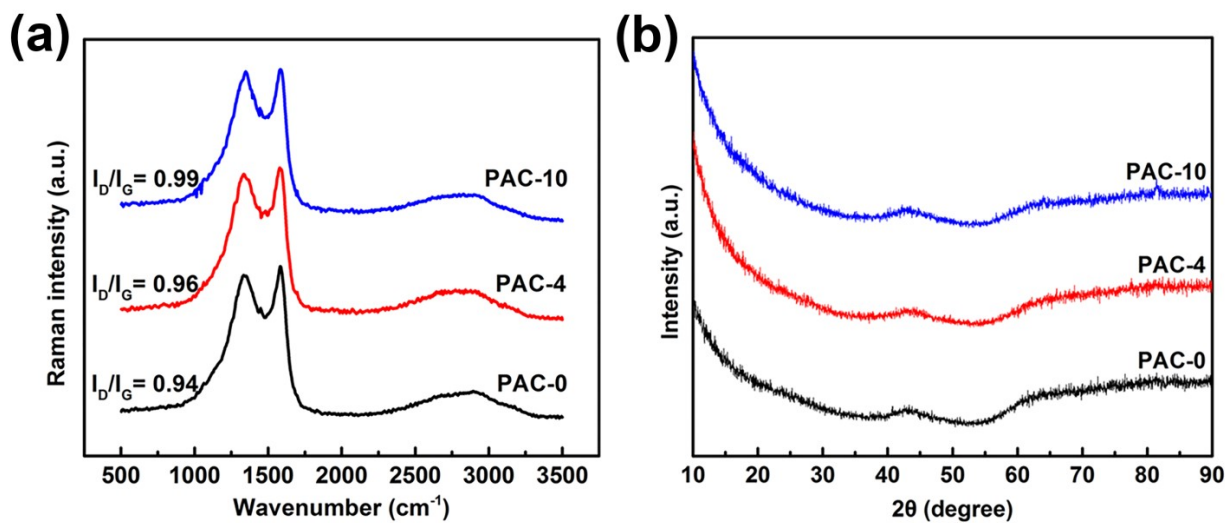

Fig. S4 (a) Raman spectra and (b) XRD patterns of PAC-0, PAC-4 and PAC-10.

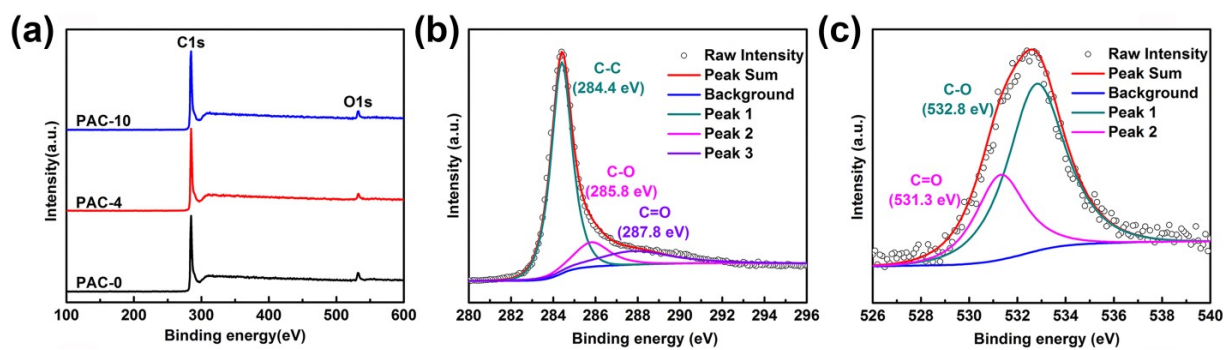

Fig. S5 (a) XPS survey spectra of PAC-0, PAC-4 and PAC-10. High resolution (b) C1s and (c) O1s spectra of PAC-10.

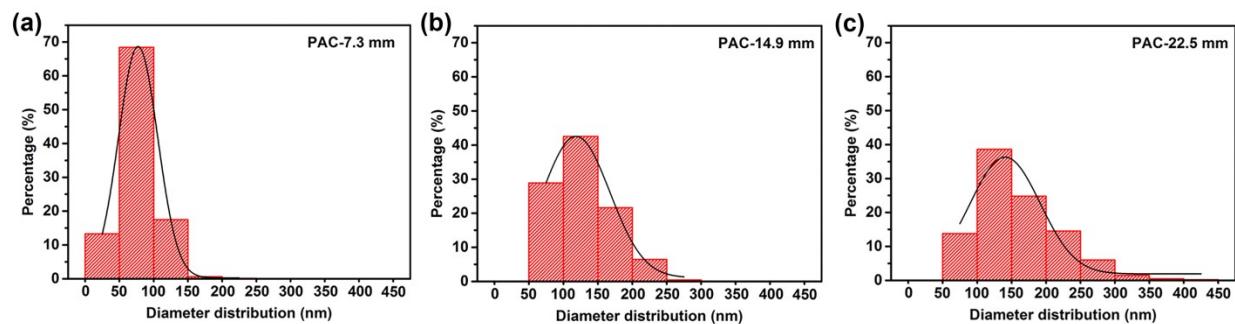

**Fig. S6** Pore diameter distribution statistics (based on SEM images) of PACs prepared at the tablet thickness of 7.3 (a), 14.9 (b) and 22.5 mm (c).

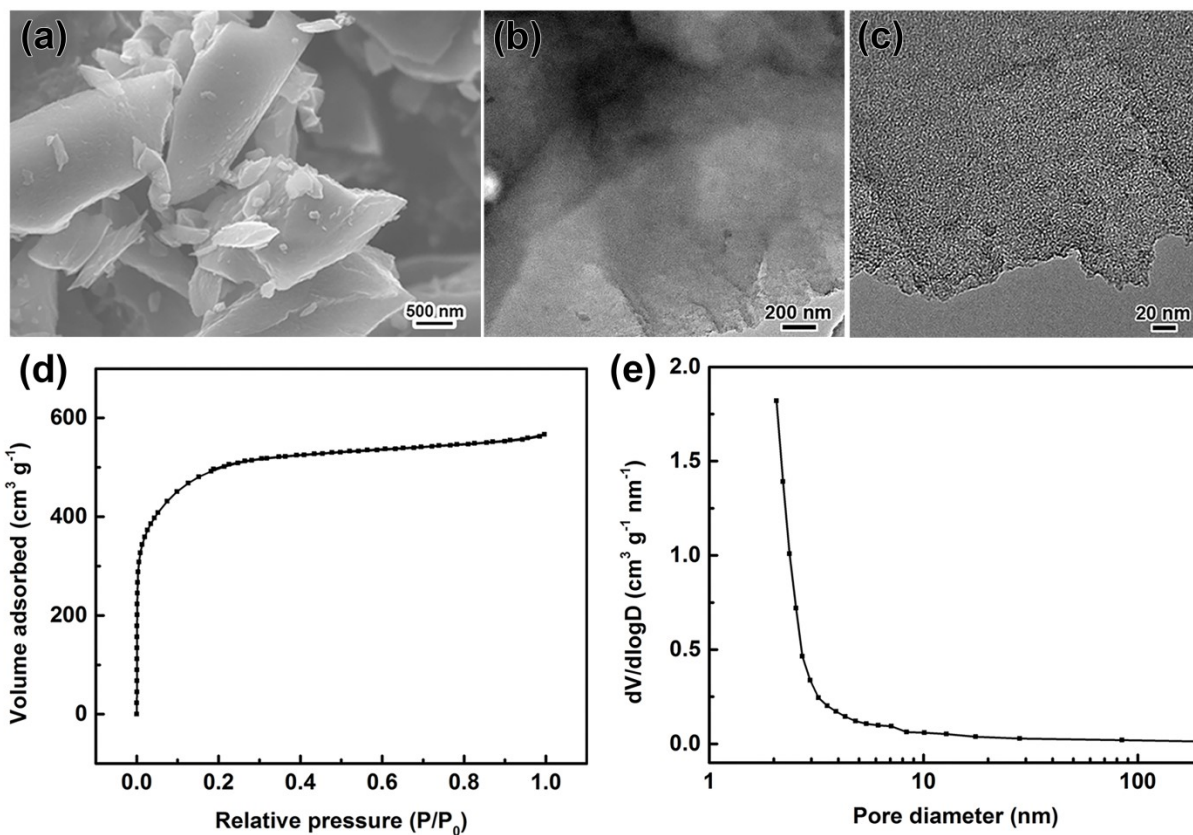

**Fig. S7** (a) SEM, (b) TEM and (c) HR-TEM images of CAC. (d)  $N_2$  adsorption/desorption isotherm and (e) BJH pore size distribution of CAC.

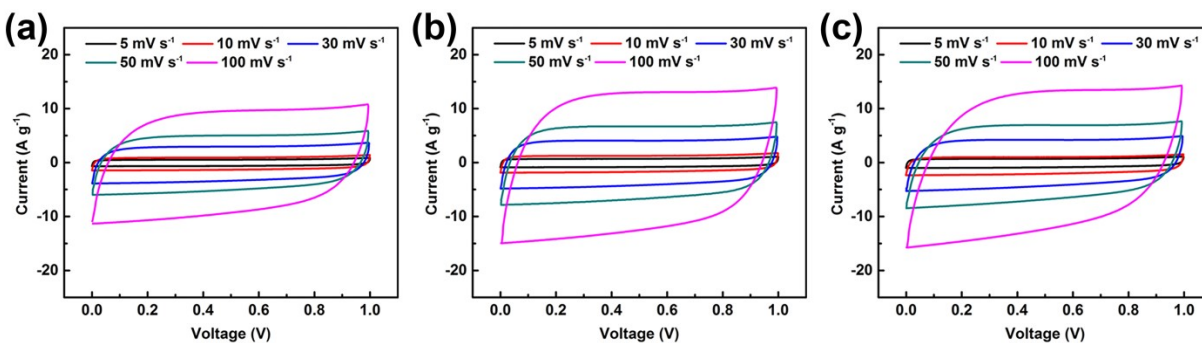

**Fig. S8** CV curves of (a) CAC, (b) PAC-0 and (c) PAC-4 at different scan rates as electrodes for SSCs.

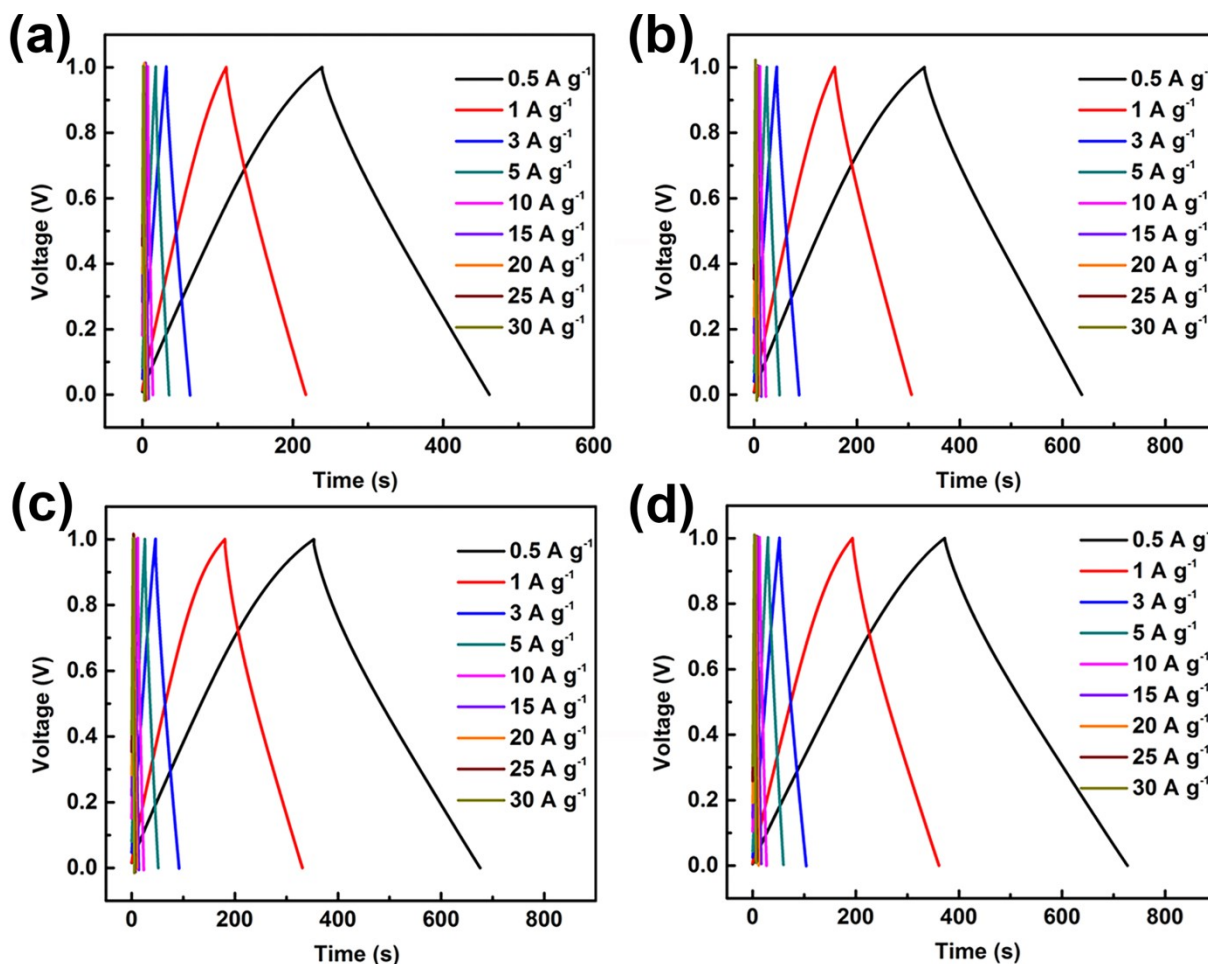

**Fig. S9** Galvanostatic charge/discharge curves of (a) CAC, (b) PAC-0, (c) PAC-4 and (d) PAC-10 at different current densities as electrodes for SSCs.

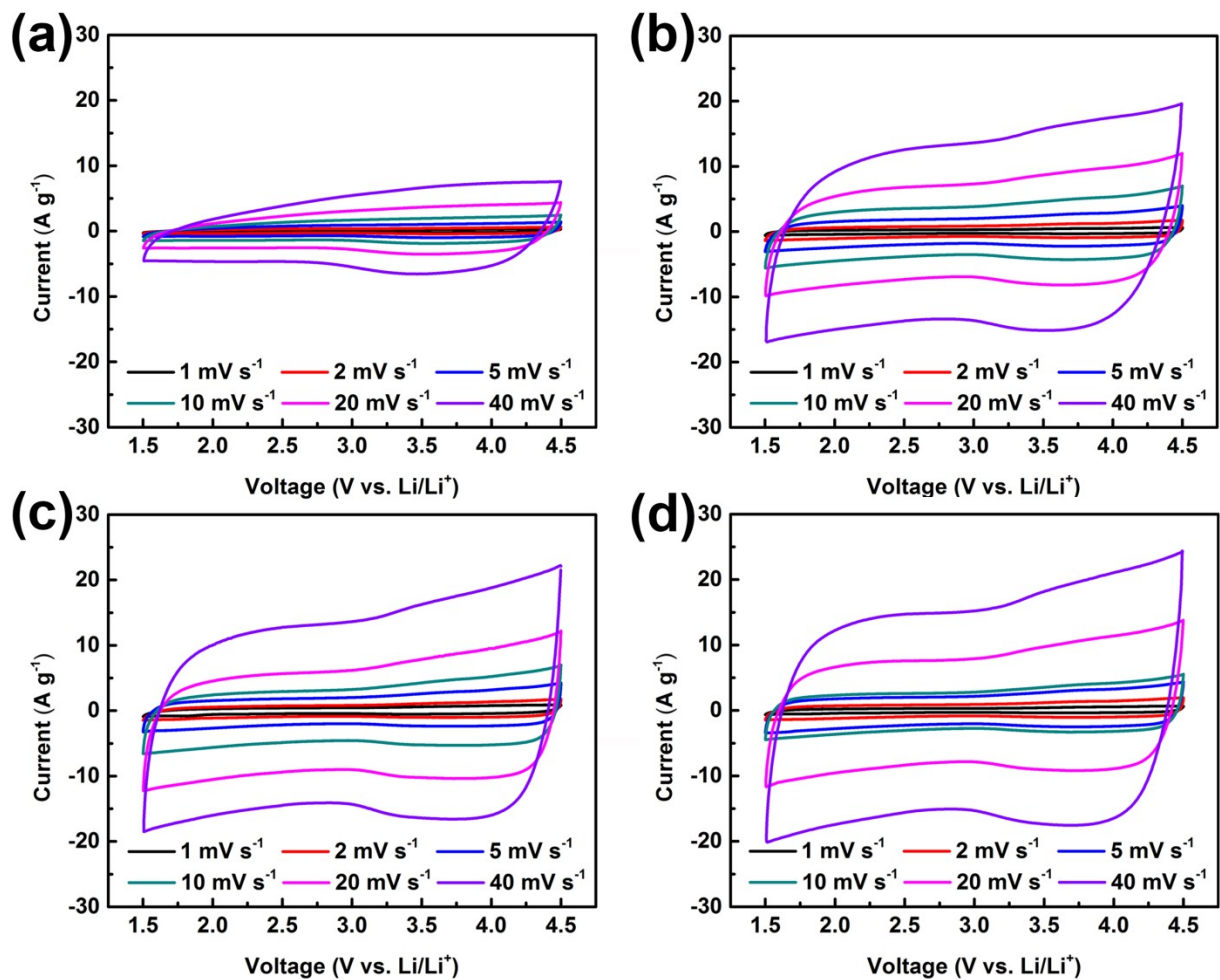

**Fig. S10** CV curves of (a) CAC, (b) PAC-0, (c) PAC-4 and (d) PAC-10 at different scan rates as cathodes for LICs.

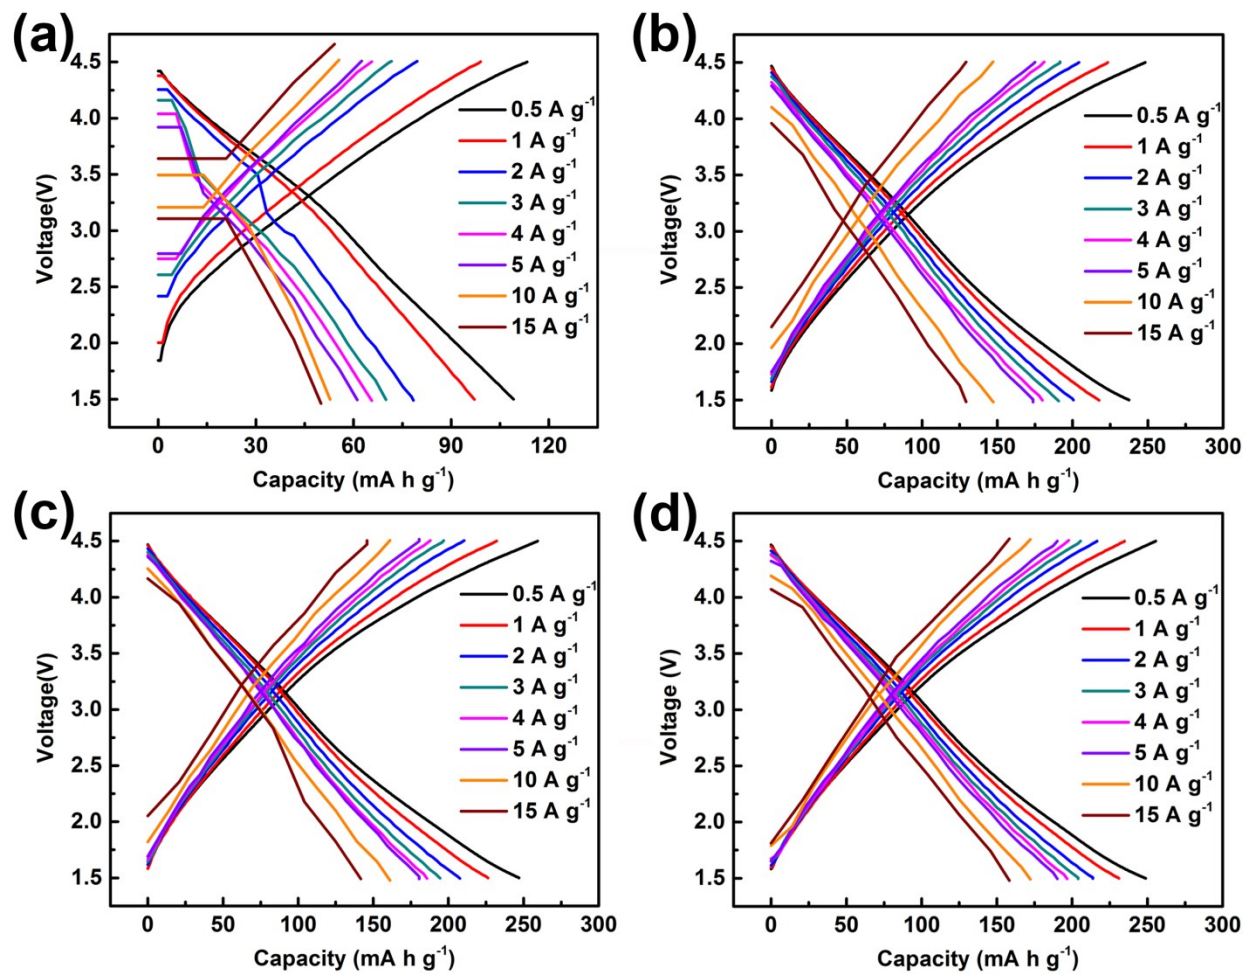

**Fig. S11** Charge/discharge curves of (a) CAC, (b) PAC-0, (c) PAC-4 and (d) PAC-10 at different current densities as cathodes for LICs.

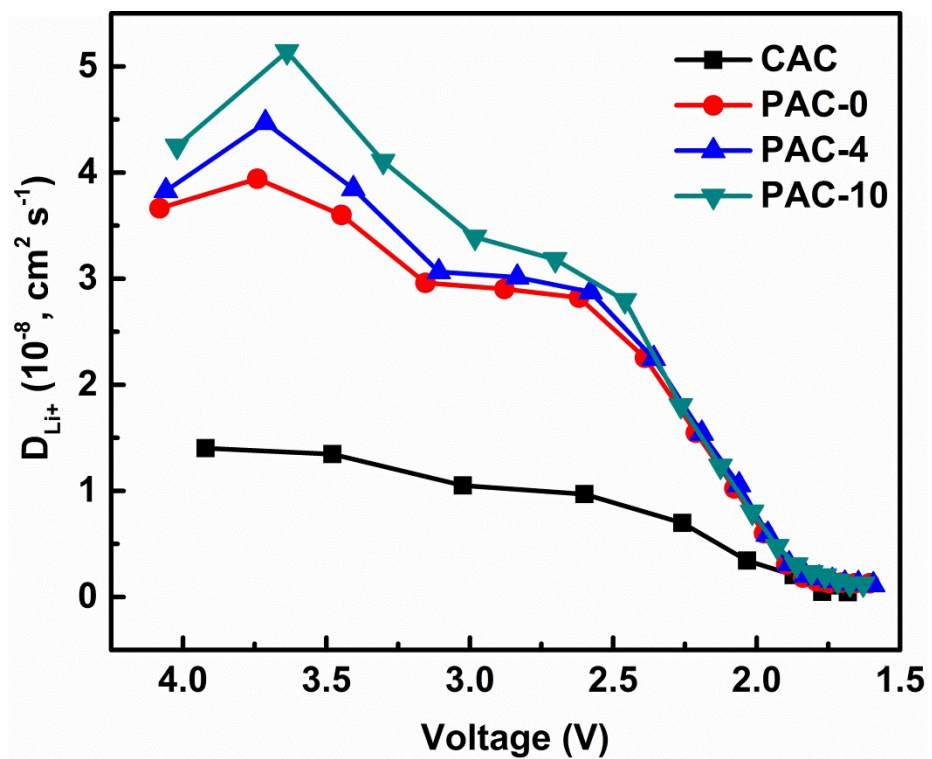

**Fig. S12** Li<sup>+</sup> diffusion coefficients in the CAC, PAC-0, PAC-4 and PAC-10 cathodes.



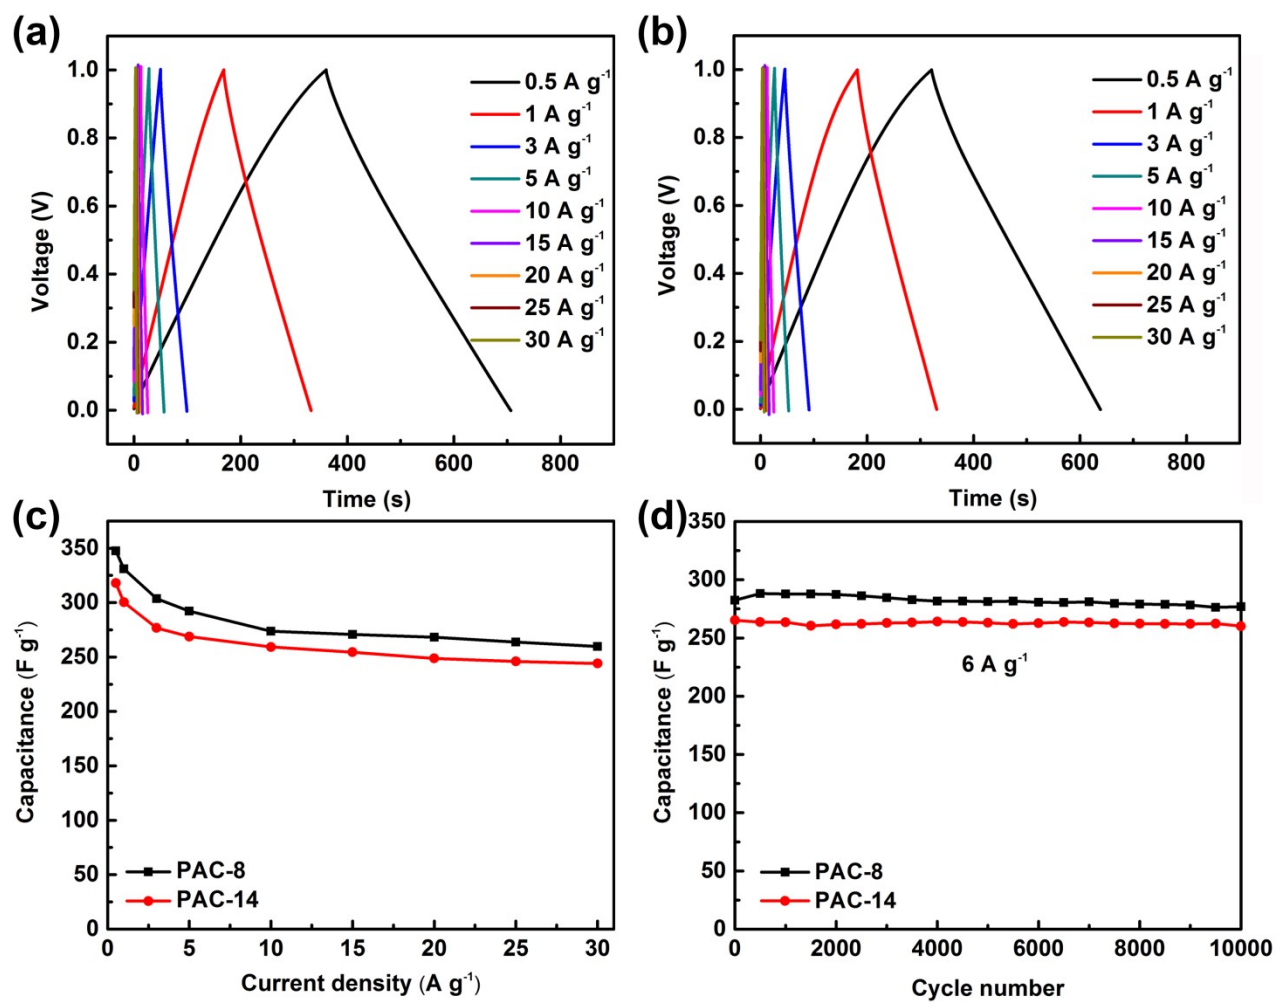

**Fig. S13** Galvanostatic charge/discharge curves of (a) PAC-8 and (b) PAC-14 electrodes at different current densities. (c) Rate capabilities and (d) cycling performances at 6 A g<sup>-1</sup> of PAC-8 and PAC-14 electrodes for SSCs in 6M KOH electrolyte.

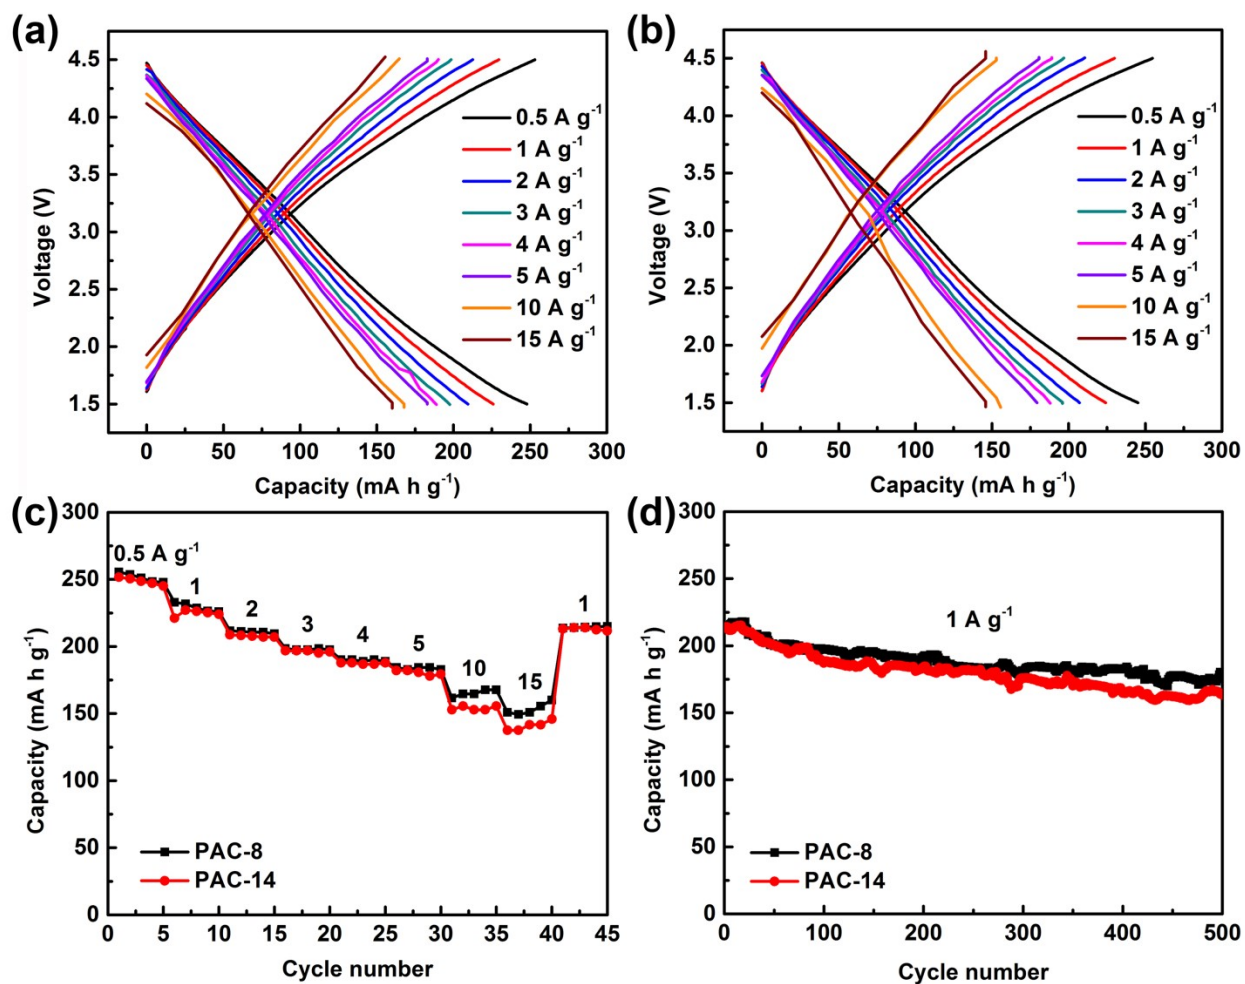

**Fig. S14** Charge/discharge curves of (a) PAC-8 and (b) PAC-14 cathodes at different current densities.

(c) Rate capabilities and (c) cycling performances at 1 A g<sup>-1</sup> of PAC-8 and PAC-14 cathodes for LICs.

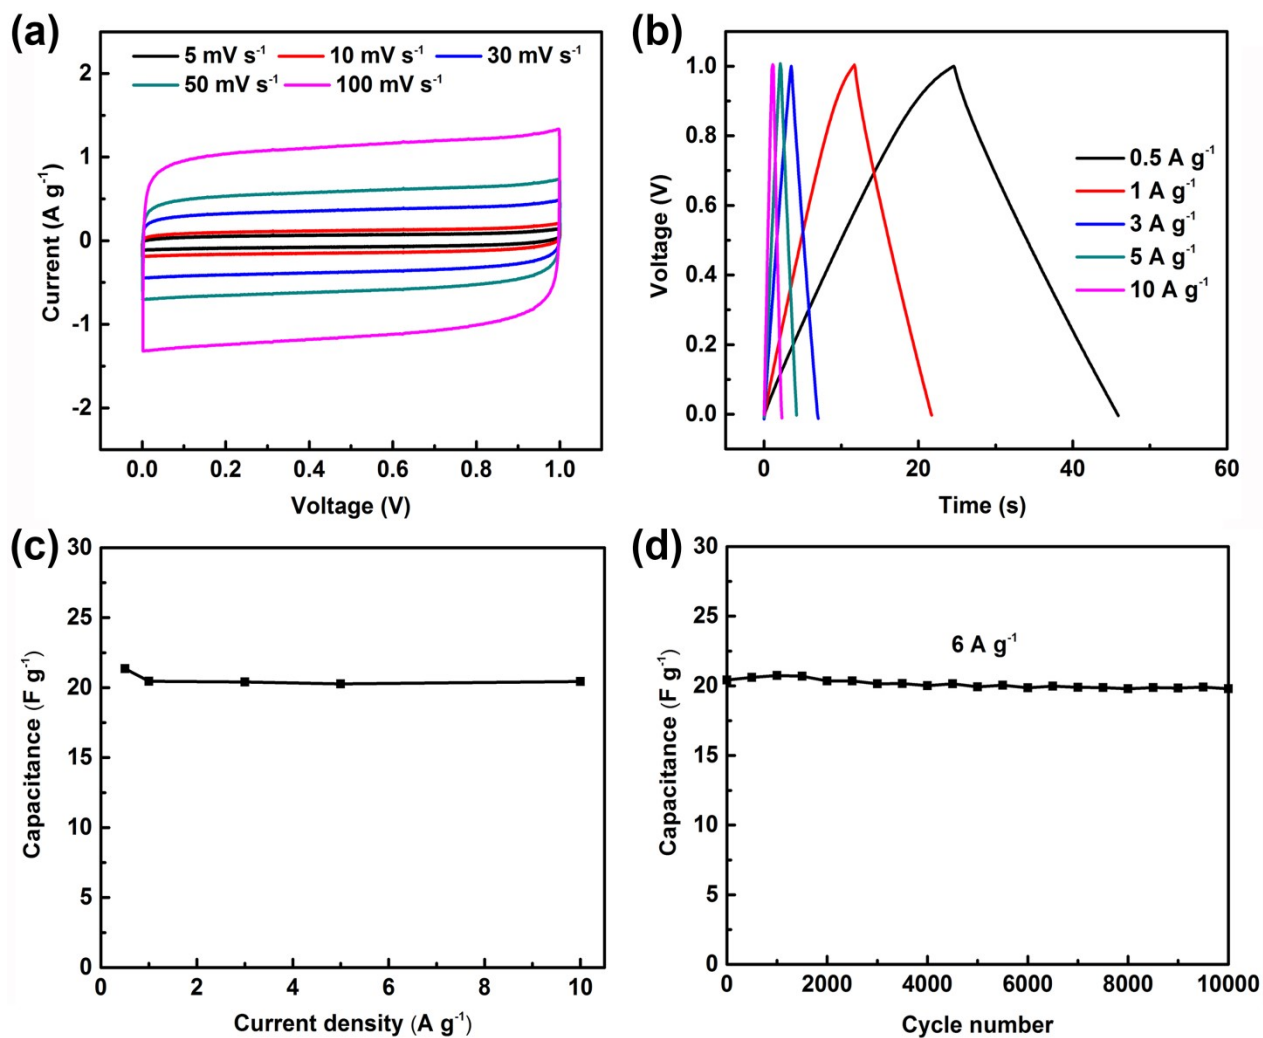

**Fig. S15** (a) CV profiles at different scan rates, (b) galvanostatic charge/discharge curves at different current densities, (c) rate capability and (d) cycling performance at 6 A g<sup>-1</sup> of PAC-10-0KOH electrode for SSCs in 6M KOH electrolyte.

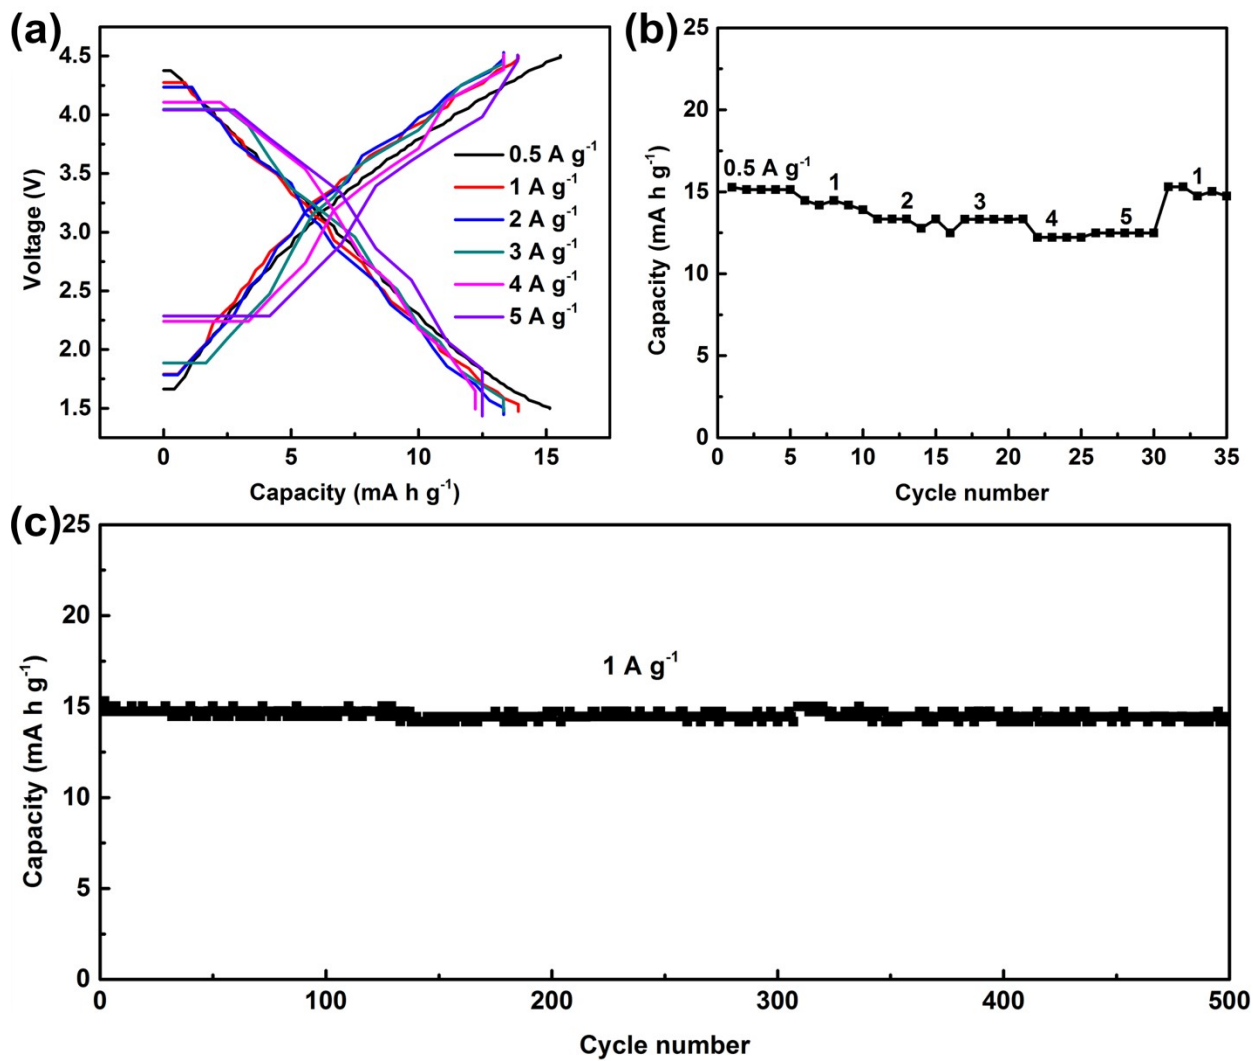

**Fig. S16** (a) Charge/discharge curves at different current densities, (b) rate capability and (c) cycling performance at  $1 \text{ A g}^{-1}$  of PAC-10-0KOH cathode for LICs.

**Table S1** Pore structure parameters of CAC and PACs prepared at different tableting pressures, different tablet thicknesses and without adding KOH.

| Sample      | $S_{\text{BET}}$<br>( $\text{m}^2 \text{g}^{-1}$ ) | $V_{\text{t}}$<br>( $\text{cm}^3 \text{g}^{-1}$ ) | $V_{\text{micro}}$<br>( $\text{cm}^3 \text{g}^{-1}$ ) | $V_{\text{meso}}$<br>( $\text{cm}^3 \text{g}^{-1}$ ) | $V_{\text{meso}}/V_{\text{t}}$<br>% | $D_{\text{a}}$<br>(nm) |
|-------------|----------------------------------------------------|---------------------------------------------------|-------------------------------------------------------|------------------------------------------------------|-------------------------------------|------------------------|
| CAC         | 1627                                               | 0.88                                              | 0.72                                                  | 0.16                                                 | 18.2                                | 2.15                   |
| PAC-0       | 3015                                               | 1.63                                              | 1.23                                                  | 0.40                                                 | 24.5                                | 2.17                   |
| PAC-4       | 3099                                               | 1.79                                              | 1.25                                                  | 0.54                                                 | 30.2                                | 2.31                   |
| PAC-8       | 3174                                               | 1.84                                              | 1.28                                                  | 0.56                                                 | 30.4                                | 2.32                   |
| PAC-10      | 3211                                               | 2.02                                              | 1.25                                                  | 0.77                                                 | 38.1                                | 2.52                   |
| PAC-14      | 3074                                               | 1.82                                              | 1.24                                                  | 0.58                                                 | 31.9                                | 2.36                   |
| PAC-7.3 mm  | 3015                                               | 1.67                                              | 1.23                                                  | 0.44                                                 | 26.3                                | 2.21                   |
| PAC-14.9 mm | 3174                                               | 1.84                                              | 1.28                                                  | 0.56                                                 | 30.4                                | 2.32                   |
| PAC-22.5 mm | 2931                                               | 1.90                                              | 1.15                                                  | 0.75                                                 | 39.5                                | 2.60                   |
| PAC-10-0KOH | 37                                                 | 0.03                                              | -                                                     | -                                                    | -                                   | 2.70                   |

Note: The sample PAC-8 and PAC-14.9 mm represent the same PAC.

**Table S2** Pore structure parameters of PAC-10 samples prepared at different heating rates of 5, 10 and 20 °C min<sup>-1</sup>.

| Sample                         | $S_{\text{BET}}$<br>( $\text{m}^2 \text{g}^{-1}$ ) | $V_{\text{t}}$<br>( $\text{cm}^3 \text{g}^{-1}$ ) | $V_{\text{micro}}$<br>( $\text{cm}^3 \text{g}^{-1}$ ) | $V_{\text{meso}}$<br>( $\text{cm}^3 \text{g}^{-1}$ ) | $V_{\text{meso}}/V_{\text{t}}$<br>% | $D_{\text{a}}$<br>(nm) |
|--------------------------------|----------------------------------------------------|---------------------------------------------------|-------------------------------------------------------|------------------------------------------------------|-------------------------------------|------------------------|
| PAC-10-5 °C min <sup>-1</sup>  | 3075                                               | 1.77                                              | 1.24                                                  | 0.53                                                 | 29.9                                | 2.31                   |
| PAC-10-10 °C min <sup>-1</sup> | 3211                                               | 2.02                                              | 1.25                                                  | 0.77                                                 | 38.1                                | 2.52                   |
| PAC-10-20 °C min <sup>-1</sup> | 3182                                               | 1.85                                              | 1.21                                                  | 0.64                                                 | 34.6                                | 2.33                   |

**Table S3** Surface compositions of PAC-0, PAC-4 and PAC-10 samples (XPS spectra).

| Sample | C (at%) | O (at%) |
|--------|---------|---------|
| PAC-0  | 94.98   | 5.02    |
| PAC-4  | 95.83   | 4.17    |
| PAC-10 | 95.96   | 4.04    |

**Table S4** Comparison of the electrochemical performances of some previously reported AC materials when measured in a two-electrode system using 6M KOH aqueous electrolyte.

| Samples               | SSA<br>(m <sup>2</sup> g <sup>-1</sup> ) | Voltage<br>window<br>(V) | Specific capacitance                       |                                     | Cycling stability                          |                 |                                 | Ref.         |
|-----------------------|------------------------------------------|--------------------------|--------------------------------------------|-------------------------------------|--------------------------------------------|-----------------|---------------------------------|--------------|
|                       |                                          |                          | Current<br>density<br>(A g <sup>-1</sup> ) | Capacitance<br>(F g <sup>-1</sup> ) | Current<br>density<br>(A g <sup>-1</sup> ) | Cycle<br>number | Capacitance<br>retention<br>(%) |              |
| HPC <sub>20-800</sub> | 2102                                     | 0-1.0                    | 0.4                                        | 244                                 | 5                                          | 10000           | 91.1                            | [44]         |
| SRPC-4K               | 2143                                     | 0-1.0                    | 0.5                                        | 276                                 | 5                                          | 10000           | 98                              | [45]         |
| AHPC                  | 2650                                     | 0-1.0                    | 0.5                                        | 310                                 | 10                                         | 10000           | 95                              | [46]         |
| GHC-17                | 2818                                     | 0-1.0                    | 0.5                                        | 427                                 | 4.5                                        | 5000            | 94                              | [47]         |
| HGPC-A                | 1009                                     | 0-1.0                    | 0.5                                        | 203                                 | 10                                         | 10000           | 88.5                            | [48]         |
| WSPC                  | 2465                                     | 0-1.4                    | 0.5                                        | 207                                 | 5                                          | 8000            | 90.2                            | [49]         |
| CS3-T800              | 2812                                     | 0-1.0                    | 1                                          | 302                                 | 20                                         | 5000            | 95.0                            | [50]         |
| HPC <sub>2-700</sub>  | 1214                                     | 0-1.0                    | 1                                          | 260                                 | 5                                          | 5000            | 85.6                            | [51]         |
| HPCNs-g               | 1213                                     | 0-1.0                    | 1                                          | 221                                 | 4                                          | 10000           | 100.4                           | [52]         |
| HPC                   | 1356                                     | 0-1.0                    | 1                                          | 205                                 | 10                                         | 30000           | 99.55                           | [53]         |
| PAC-10                | 3211                                     | 0-1.0                    | 0.5<br>1                                   | 356<br>338                          | 6                                          | 10000           | 100                             | This<br>work |

**Table S5** Typical half-cell capacity of AC materials as a positive electrode for LICs based on a non-aqueous LiPF<sub>6</sub> electrolyte.

| Samples  | SSA<br>(m <sup>2</sup> g <sup>-1</sup> ) | Voltage window<br>(V) | Current density<br>(A g <sup>-1</sup> ) | Specific capacity<br>(mA h g <sup>-1</sup> ) | Ref.         |
|----------|------------------------------------------|-----------------------|-----------------------------------------|----------------------------------------------|--------------|
| SFAC-3   | 3104                                     | 2.0-4.0               | 0.5                                     | 78                                           | [59]         |
| eAC-900  | 3250                                     | 2.0-4.5               | 0.4                                     | 127                                          | [60]         |
| CPAC-5   | 3011                                     | 2.0-4.5               | 0.5                                     | 107                                          | [61]         |
| LDAC     | 2808                                     | 2.0-4.5               | 0.5                                     | 130                                          | [62]         |
| AC       | 1600                                     | 2.0-4.5               | 0.5                                     | 97                                           | [63]         |
| HPC-800  | 3285                                     | 2.0-4.2               | 0.5                                     | 104                                          | [64]         |
| NDPC-0.5 | 1506                                     | 2.0-4.5               | 0.5                                     | 78                                           | [65]         |
| APDC-700 | 2449                                     | 2.0-4.5               | 0.5                                     | 147                                          | [66]         |
| PCNs-800 | 1317                                     | 2.0-4.5               | 0.5                                     | 78                                           | [67]         |
| KAC-6    | 2719                                     | 1.5-4.5               | 0.5                                     | 167                                          | [68]         |
| PAC-10   | 3211                                     | 1.5-4.5               | 0.5<br>15                               | 251<br>158                                   | This<br>work |
